# Supplementary material for: Tracking fructose 1,6-bisphosphate dynamics in liver cancer cells using a fluorescent biosensor
Source: PubMed Central journal article supplement — iScience. 2024 Nov 6;27(12):111336. doi: 10.1016/j.isci.2024.111336 (PMC11617404; doi:10.1016/j.isci.2024.111336), 2024-11-06
Supplement: mmc1.pdf [file mmc1.pdf]

**iScience, Volume 27**

**Supplemental information**

**Tracking fructose 1,6-bisphosphate dynamics in  
liver cancer cells using a fluorescent biosensor**

**Israel Pérez-Chávez, John N. Koberstein, Julia Malo Pueyo, Eduardo H. Gilgioni, Didier Vertommen, Nicolas Baeyens, Daria Ezeriņa, Esteban N. Gurzov, and Joris Messens**

**Data S1. HYlight/HYlight Null aminoacid and codon-optimized DNA sequence for its usage in HepG2, HLE, and Huh6 cell lines.** Related to figure 1.

Color Legend

CggR 96-180

Linkers

cpGFP

CggR 181-340

EcoRI/XhoI

BamHI/HindIII

HYlight Null Mutation (T152E)

Amino Acid Sequence:

MGSKDVLGLTLEKTLKERLNLKDIIIVSGDSDQSPWVKKEMGRAAVACMKKRFSGKNI  
VAVTGGTTIEAVAEMMTPDSKNRELLFVPARGGLGEPYNVFIMADKQKNGIKANFKIR  
HNIEDGGVQLAYHYQQNTPIGDGPVLLPDNHVLSVQSKLSKDPNEKRDHMLLEFVTA  
AGITLGMDELYKGGTGGSMVSKGEELFTGVVPIVVELDGDVNGHKFSVSGEGEGDATY  
GKLTLLKFICTTGKLPVPWPTLVTTLTYGVCFSRYPDHMKQHDFFKSAMPEGYIQERTI  
FFKDDGNYKTRAEVKFEGDTLVNRIELKGIKIDFKEDGNILGHKLEYNFKEDVKNQANTIC  
AHMAEKASGTYRLLFVPGQLSQGAYSSIIIEPSVKEVLNTIKSASMLVHGIGEAKTMAQ  
RRNTPLEDLKKIDDNDVAVTEAFGYFADGEVHVHVSVMQLDDIDAIPDIIAVAGGSS  
KAEAIEAYFKKPRNTVLVTDEGAACKLLRDESG\*

DNA Sequence:

GAATTCGGATCCATGGGCAGCAAAGACGTGCTGGGGCTGACCCTGCTGGAAAAACCCTGA  
AAGAACGCCTGAATCTGAAAGACGCCATTATCGTTAGCGGCGATAGCGACCAAAGCCCATG  
GGTCAAAAAAGAAATGGGCCGCGCTGCTGTTGCTTGTATGAAGAAACGCTTTAGCGGCAAG  
AATATCGTGGCCGTTACTGGGGGGACTACCATTGAAGCCGTGGCCGAGATGATGACCCCAG  
ATAGCAAAAATCGCGAACTGCTGTTTGTGCCAGCTCGCGGCGGTCTGGGGGAACCTCCTTA  
TAACGTCTTTATCATGGCCGACAAGCAGAAGAACGGCATCAAGGCCAACTTCAAGATCCGCC  
ACAACATCGAGGACGGCGGCGTGCAGCTGGCCTATCACTACCAGCAGAACACCCCTATCGG  
CGACGGCCCTGTGCTGCTGCCTGACAACCACTACCTGAGCGTGCAGAGCAAACCTGAGCAAA  
GACCCTAACGAGAAGCGCGATCACATGGTCCTGCTGGAGTTCGTGACCGCCGCCGGGATC  
ACTCTGGGCATGGACGAGCTGTACAAGGGCGGCACCGGCGGGAGCATGGTGAGCAAGGG  
CGAGGAGCTGTTACCGGGGTGGTGCCTATCCTGGTCGAGCTGGACGGCGACGTGAACGG  
CCACAAGTTCAGCGTGAGCGGCGAGGGCGAGGGCGATGCCACCTACGGCAAGCTGACCCT  
GAAGTTCATCTGCACCACCGGCAAGCTGCCTGTGCCTTGGCCTACCCTGGTGACCACCCTG  
ACCTACGGCGTGCAGTGCTTCAGCCGCTACCCTGACCACATGAAGCAGCAGCACTTCTTCA  
AGAGCGCCATGCCTGAAGGCTACATTCAGGAGCGCACCATCTTCTTCAAGGACGACGGCAA  
CTATAAGACCCGCGCTGAGGTTAAGTTCGAGGGCGACACTCTGGTTAACCGCATCGAGCTG  
AAGGGCATCGACTTCAAGGAGAGACGGCAACATCCTGGGCCATAAGCTGGAATATAACTTC  
AACAAAGGAGGATGTGAAGAATCAAGCTAATACCATTTGTGCACATATGGCCGAGAAAAGCCAG  
CGGTACCTATCGCCTGCTGTTTGTCCCTGGTCAGCTGAGCCAAGGTGCATACAGCAGCATT  
ATCGAAGAACCTAGCGTCAAAGAAGTCCTGAATACCATCAAAGCGCTAGCATGCTGGTCCA  
TGGGATTGGGGAAGCAAAAATATGGCTCAGCGCCGCAATACCCCACTGGAAGACCTGAAA  
AAGATCGATGATAATGATGCCGTGACCGAAGCCTTTGGCTACTATTTTAATGCTGATGGTGA  
GGTGGTGCATAAAGTGCATAGCGTGGGTATGCAACTGGATGATATTGATGCCATCCCTGATA  
TTATTGCAGTCGCAGGTGGGAGCAGCAAGGCAGAGGCAATTGAGGCATATTTTAAGAAACC  
ACGCAATACTGTTCTGGTCACTGATGAGGGTGTGTCGCAAAAAGCTGCTGCGCGATGAAAGC  
GGCTAAAGCTTCTCGAG

Fig. S1.

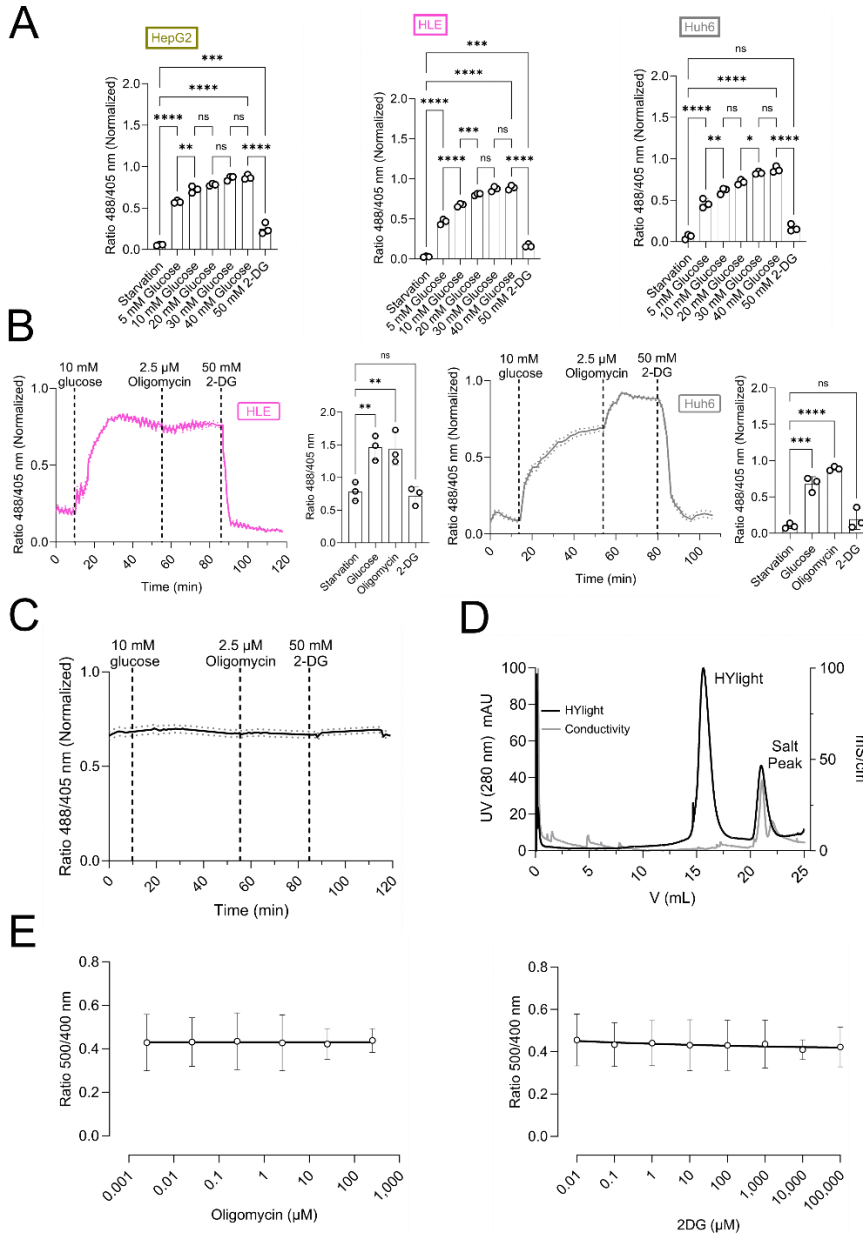

**Figure S1. HYlight response varies across human liver cell lines. Related to Figure 1. A.** Averaged fluorescence ratio upon compound addition in HepG2, HLE and Huh6 cells. Data are shown as mean  $\pm$  SD. **B.** Averaged min-max normalized ratio change of HYlight in HLE and Huh6 cells after 1 h of glucose starvation and following the addition of glucose, oligomycin, and 2-deoxy-D-glucose (2-DG). Data are the mean  $\pm$  SEM. Averaged min-max normalized fluorescence ratio upon compound addition. Data are shown as mean  $\pm$  SD. n=3 with approximately 50 cells per replicate. **C.** No change of the ratio of HYlight Null in Hep G2 cells after 1 h of glucose starvation and following the addition of glucose, oligomycin, and 2-DG. Data are mean  $\pm$  SEM. n=3 Approximately 50 cells per replicate. **D.** Size exclusion chromatography (SEC) on Superdex 200 10/300 of HYlight which elutes as a single peak indicating a monomeric state. **E.** No change in fluorescence ratio as a function of oligomycin and 2-DG concentration using purified recombinantly expressed HYlight. Data are shown as mean  $\pm$  SD. n=3. ns: No significant; \* $<0.05$ ; \*\* $<0.005$ ; \*\*\* $<0.0005$ ; \*\*\*\* $<0.00005$ . Ordinary One-Way ANOVA Šídák's Multiple Comparisons Test. Related to figure 1.

**Fig. S2.**

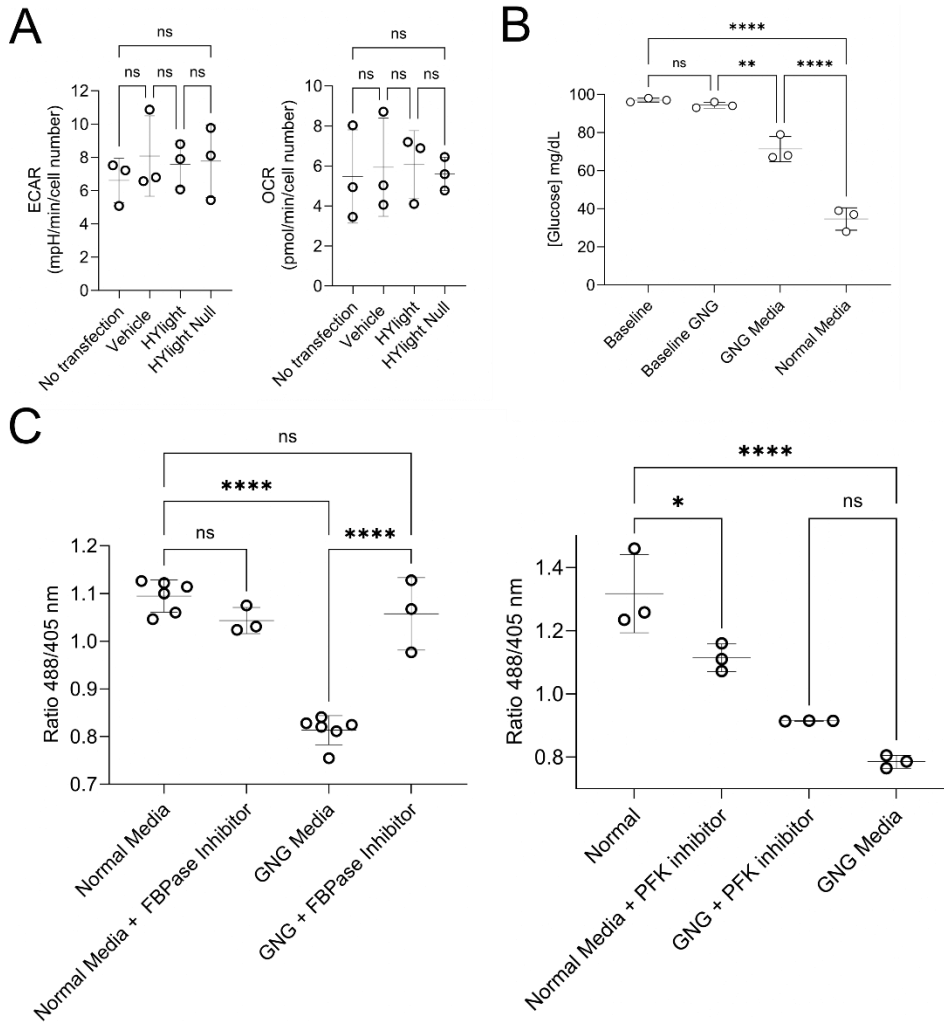

**Figure S2. HYlight does not affect fructose 1,6-bisphosphate (FBP) levels in liver cells, and its response is exclusively linked to glycolysis. Related to Figure 2. A.** ECAR and OCR differences at averaged glucose addition. ECAR is expressed in milli-pH units per minute and normalized to cell number. OCR is expressed in picomoles of oxygen per minute and normalized to cell number. Mean  $\pm$  SD.  $n=3$  **B.** Comparison of media glucose content after 48 h between gluconeogenic media (GNG) and normal media (DMEM GlutaMAX™) in HepG2 cells. Data are shown as mean  $\pm$  SD.  $n=3$  **C.** Averaged change in the fluorescence ratio of HYlight in HepG2 liver cancer cells after glucose addition. Comparison between gluconeogenic media (GNG) and normal media (DMEM GlutaMAX™) in the presence or absence of either 20  $\mu$ M FBP1 inhibitor or 20  $\mu$ M PFK inhibitor. Mean  $\pm$  SD.  $n=3$ , with minimum 50 cells per replicate. ns: Not significant; \* $<0.05$ ; \*\* $<0.005$ ; \*\*\* $<0.0005$ ; \*\*\*\* $<0.00005$ . Ordinary One-Way ANOVA Šídák's Multiple Comparisons Test. Related to figure 2.

**Fig. S3.**

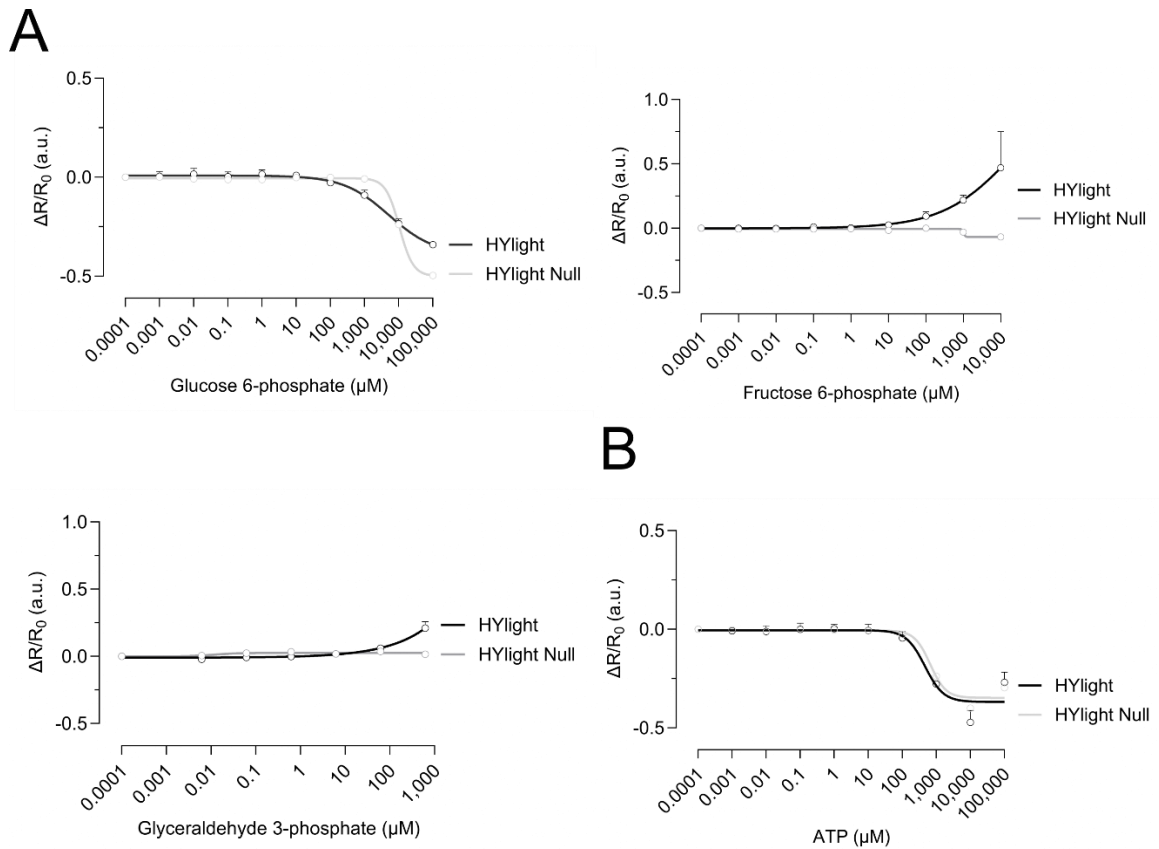

**Figure S3. Dihydroxyacetone phosphate binds HYlight. Related to Figure 4. A.** Change of the fluorescence ratio in HYlight and HYlight Null relative to 0  $\mu\text{M}$  as a function of glucose 6-phosphate, fructose 6-phosphate, and glyceraldehyde 3-phosphate concentrations. **B.** Change of the fluorescence ratio in HYlight and HYlight Null relative to 0  $\mu\text{M}$  as a function of ATP concentrations. SEC: Size Exclusion Chromatography Buffer: 50 mM Tris pH 7.5; 125 mM NaCl. R=Ratio 500 nm/400 nm.  $\Delta R/R_0=(R_x-R_0)/R_0$ . The data are shown as the mean  $\pm$  SD.  $n=3$  for each concentration. Related to figure 4.

Fig. S4.

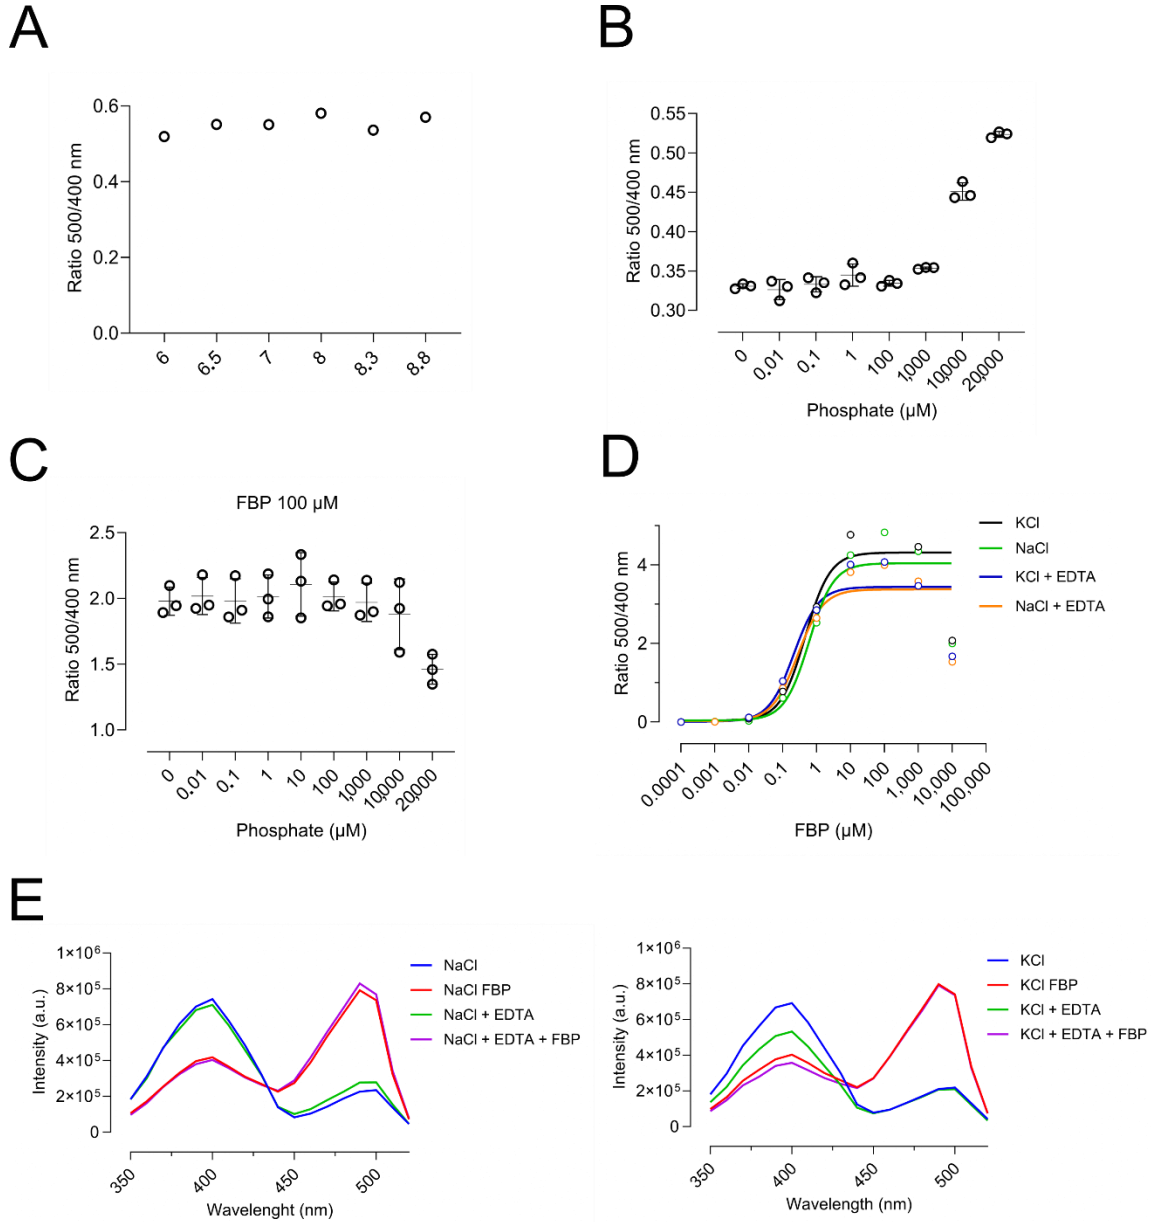

**Figure S4. HYLIGHT is sensitive to phosphorous compounds but not to metal binding. Related to Figure 6.** **A.** Change of the fluorescence ratio in HYLIGHT Null at different pH values. **B.** Fluorescence ratio change of HYLIGHT at different phosphate concentrations **C.** Fluorescence ratio change of HYLIGHT at different phosphate concentrations in the presence of 100 µM of fructose 1,6-bisphosphate (FBP). **D.** Relative change of the fluorescence ratio in HYLIGHT as a function of different FBP concentrations in the presence of 150 mM NaCl, 150 mM KCL, and/or 0.1 mM EDTA. **E.** Excitation spectra of HYLIGHT in the presence of 150 mM NaCl, 150 mM KCL, and/or 0.1 mM EDTA and 100 µM FBP. Data are shown as mean ± SD. n=3 for each experiment. Related to figure 6.

Fig. S5.

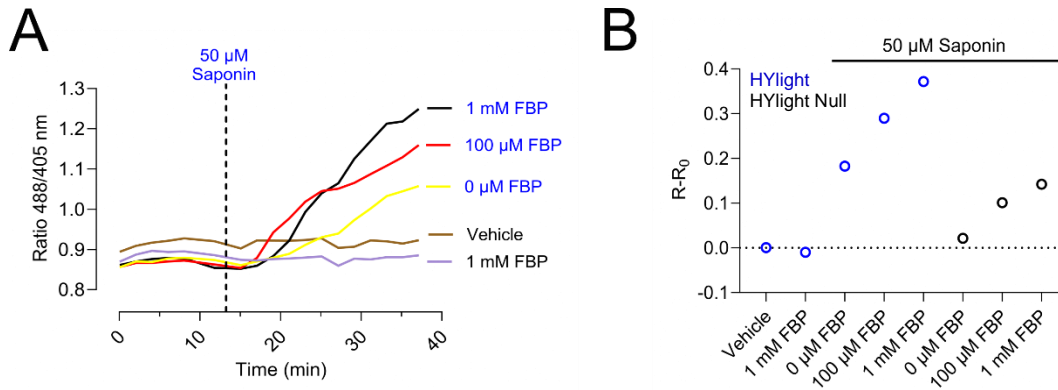

**Figure S5. Saponin permeabilizes the cellular membrane allowing the entry of fructose 1,6-bisphosphate (FBP) in HepG2 cells. Related to Figure 7. A.** Change of the fluorescence ratio of HYlight in HepG2 liver cancer cells after 1 h of glucose starvation and sequential addition of 50  $\mu$ M Saponin and various concentrations of FBP. **B.** Maximum fluorescence ratio of HYlight and HYlight Null in HepG2 liver cancer cells after 1 hour of glucose starvation and addition of 50  $\mu$ M saponin and various concentrations of FBP.  $R-R_0$ =Ratio 488/405 nm - Minimum Ratio 488/405 nm.  $n=1$ , with at least 50 cells per condition. Related to figure 7.

**Table S1.** Fructose 1,6-bisphosphate concentrations in cells. Related to figure 7.

| FBP ( $\mu\text{M}$ ) | Treatment                    | Cell Type               | Organism             | Method            | Source          |
|-----------------------|------------------------------|-------------------------|----------------------|-------------------|-----------------|
| 1520 (Absolute)       | -                            | Kidney (iBMK)           | <i>M. musculus</i>   | Mass Spectrometry | 1               |
| 31                    | -                            | Human Erythrocyte       | <i>H. sapiens</i>    | -                 | 2               |
| 1 (Free in liver)     | -                            | Liver                   | <i>R. rattus</i>     | -                 | 3               |
| 50 (Maximum)          | -                            | Liver                   | -                    | -                 | 4               |
| 50                    | -                            | Liver                   | <i>R. rattus</i>     | -                 | 5               |
| 8 (Enzyme site)       | -                            | Liver                   | <i>R. rattus</i>     | Enzymatic Assay   | 6               |
| 100 $\pm$ 50          | 5 mM Glucose                 | Liver                   | <i>R. norvegicus</i> | Enzymatic Assay   | 7               |
| 25000 $\pm$ 7600      | 5 mM Glucose                 | Liver Hepatoma (AS-30D) | <i>R. norvegicus</i> | Enzymatic Assay   | 7               |
| 23 $\pm$ 2            | No treatment                 | Liver Hepatoma (HepG2)  | <i>H. sapiens</i>    | Mass Spectrometry | Current Article |
| 36 $\pm$ 3            | 10 mM Glucose                | Liver Hepatoma (HepG2)  | <i>H. sapiens</i>    | Mass Spectrometry | Current Article |
| 43 $\pm$ 3            | 2.5 $\mu\text{M}$ Oligomycin | Liver Hepatoma (HepG2)  | <i>H. sapiens</i>    | Mass Spectrometry | Current Article |
| 11 $\pm$ 1            | 50 mM 2-DG                   | Liver Hepatoma (HepG2)  | <i>H. sapiens</i>    | Mass Spectrometry | Current Article |



## SI References

1. Park, J.O., Rubin, S.A., Xu, Y.F., Amador-Noguez, D., Fan, J., Shlomi, T., and Rabinowitz, J.D. (2016). Metabolite concentrations, fluxes and free energies imply efficient enzyme usage. *Nat Chem Biol* 12, 482-489. 10.1038/nchembio.2077.
2. Maskow, T., and von Stockar, U. (2005). How reliable are thermodynamic feasibility statements of biochemical pathways? *Biotechnol Bioeng* 92, 223-230. 10.1002/bit.20572.
3. Tornheim, K., and Lowenstein, J.M. (1976). Control of phosphofructokinase from rat skeletal muscle. Effects of fructose diphosphate, AMP, ATP, and citrate. *J Biol Chem* 251, 7322-7328.
4. Van Schaftingen, E., Jett, M.F., Hue, L., and Hers, H.G. (1981). Control of liver 6-phosphofructokinase by fructose 2,6-bisphosphate and other effectors. *Proc Natl Acad Sci U S A* 78, 3483-3486. 10.1073/pnas.78.6.3483.
5. Boscá, L., and Corredor, C. (1984). Is phosphofructokinase the rate-limiting step of glycolysis? *Trends in Biochemical Sciences* 9, 372-373. [https://doi.org/10.1016/0968-0004\(84\)90214-7](https://doi.org/10.1016/0968-0004(84)90214-7).
6. Albe, K.R., Butler, M.H., and Wright, B.E. (1990). Cellular concentrations of enzymes and their substrates. *Journal of Theoretical Biology* 143, 163-195. [https://doi.org/10.1016/S0022-5193\(05\)80266-8](https://doi.org/10.1016/S0022-5193(05)80266-8).
7. Marín-Hernández, A., Rodríguez-Enríquez, S., Vital-González, P.A., Flores-Rodríguez, F.L., Macías-Silva, M., Sosa-Garrocho, M., and Moreno-Sánchez, R. (2006). Determining and understanding the control of glycolysis in fast-growth tumor cells. Flux control by an over-expressed but strongly product-inhibited hexokinase. *Febs j* 273, 1975-1988. 10.1111/j.1742-4658.2006.05214.x.
